# Supplementary material for: Faulty TRPM4 channels underlie age-dependent cerebral vascular dysfunction in Gould syndrome
Source: PubMed Central journal article supplement — Proc Natl Acad Sci U S A. 2023 Jan 24;120(5):e2217327120. doi: 10.1073/pnas.2217327120 (PMC9945977; doi:10.1073/pnas.2217327120), 2023-01-24
Supplement: pnas.2217327120.sapp.pdf [file pnas.2217327120.sapp.pdf]

## Supporting Information for

### Faulty TRPM4 channels underlie age-dependent cerebral vascular dysfunction in Gould syndrome

Evan Yamasaki<sup>1</sup>, Sher Ali<sup>1</sup>, Alfredo Sanchez Solano<sup>1</sup>, Pratish Thakore<sup>1</sup>, Megan Smith<sup>2</sup>, Xiaowei Wang<sup>2</sup>, Cassandre Labelle-Dumais<sup>2</sup>, Douglas B. Gould<sup>2,3</sup>, and Scott Earley<sup>1\*</sup>

<sup>1</sup>Department of Pharmacology, Center for Molecular and Cellular Signaling in the Cardiovascular System, University of Nevada, Reno School of Medicine, Reno, Nevada, 89557-0318, USA

<sup>2</sup>Departments of Ophthalmology, Institute for Human Genetics, UCSF School of Medicine, San Francisco, CA 94158, USA

<sup>3</sup>Department of Anatomy, Institute for Human Genetics, Cardiovascular Research Institute, Bakar Aging Research Institute, UCSF School of Medicine, San Francisco, CA 94158, USA

\*Corresponding author

**Address Correspondence To:** Scott Earley, Ph.D.  
University of Nevada, Reno School of Medicine  
Manville Health Sciences Building, Room 8  
MS-0318  
Reno, NV 89557-0318, USA  
Phone: (775) 784-4117  
Fax: (775) 784-1620  
Email: [searley@med.unr.edu](mailto:searley@med.unr.edu)

#### This PDF file includes:

- Figure 1 – figure supplement 1
- Figure 1 – figure supplement 2
- Figure 3 – figure supplement 1
- Figure 5 – figure supplement 1
- Figure 5 – figure supplement 2
- Figure 5 – figure supplement 3

## Supplemental Figures:

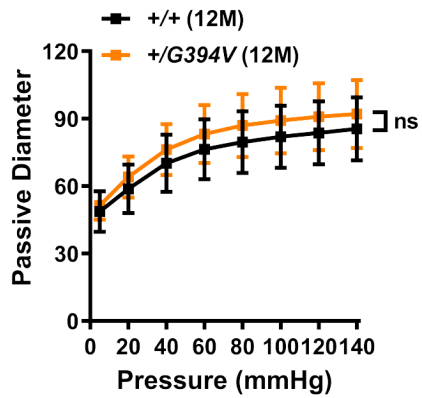

**Figure 1 – figure supplement 1 – Passive diameter of cerebral arteries from 12 M-old *Col4a1*<sup>+G394V</sup> mice.** Summary data of the passive diameter of cerebral arteries expressed as a function of intraluminal pressure. n = 8 arteries from 5 or 6 animals per group. ns = not significant, two-way ANOVA.

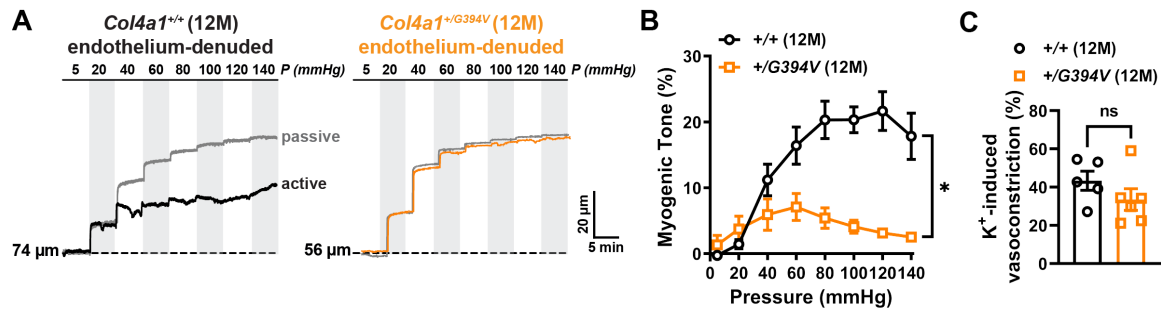

**Figure 1 – figure supplement 2 – Endothelium-denuded cerebral arteries from 12 M-old *Col4a1*<sup>+/G394V</sup> mice fail to develop myogenic tone.** (A) Typical recordings of the inner diameter of endothelium-denuded cerebral arteries from 12 M-old *Col4a1*<sup>+/+</sup> and *Col4a1*<sup>+/G394V</sup> mice in response to step-wise increases in intraluminal pressure when Ca<sup>2+</sup> is present (active) and when extracellular Ca<sup>2+</sup> has been removed (passive). (B) Summary of myogenic tone expressed as mean ± SEM as a function of intraluminal pressure. n = 5 or 6 arteries from 3 animals per group. \*P<0.05, two-way ANOVA. (C) Summary data showing vasoconstriction of endothelium-denuded isolated cerebral arteries from 12 M-old *Col4a1*<sup>+/+</sup> and *Col4a1*<sup>+/G394V</sup> mice in response to KCl (60 mM). n = 5 or 6 arteries from 3 animals per group. ns = not significant, unpaired t-test.

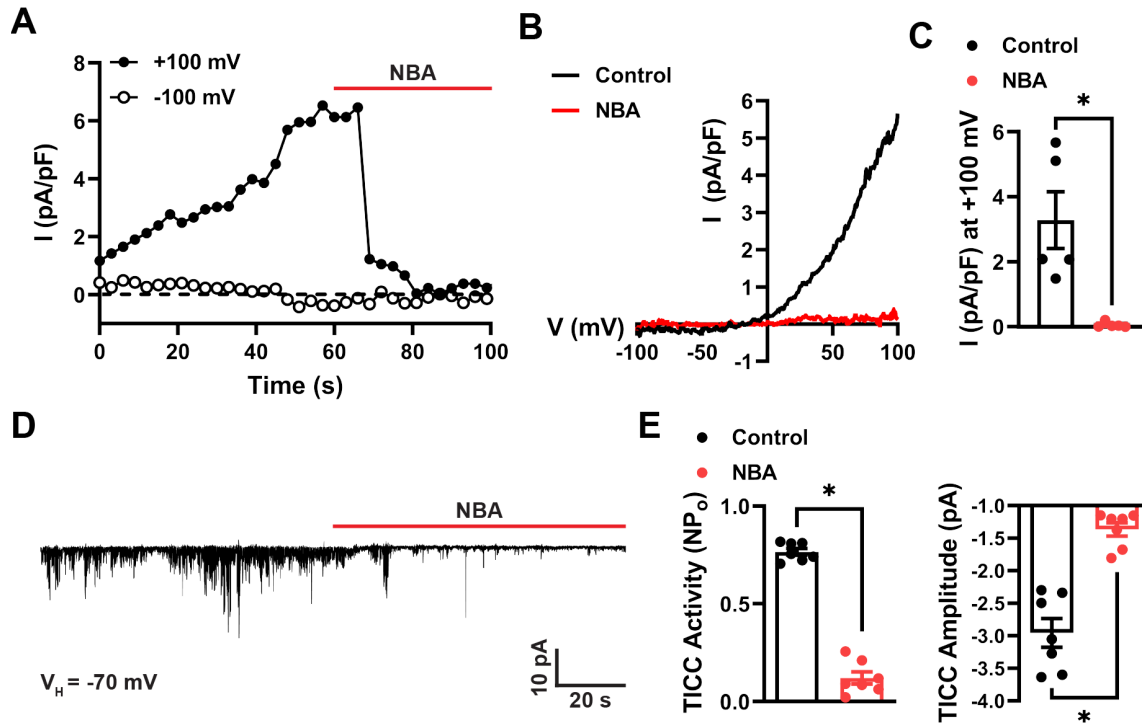

**Figure 3 – figure supplement 1 – TRPM4 inhibitor NBA blocks whole-cell  $Ca^{2+}$ -activated currents and TICCs.** (A) Representative time course of a conventional whole-cell patch-clamp recording of a SMC from a 3 M-old *Col4a1*<sup>+/+</sup> mouse showing an outwardly rectifying cation current activated by 200  $\mu$ M free  $Ca^{2+}$  in the intracellular solution as voltage ramps (-100 to +100 mV) were applied. This current was abolished by the selective TRPM4 inhibitor 4-chloro-2-(2-(naphthalene-1-yloxy) acetamido) benzoic acid (NBA; 3  $\mu$ M). (B) I-V plots for experiment shown in (A) in the presence and absence of NBA. Currents were obtained after peak current stabilized (~60s after break-in). (C) Summary of current amplitude at +100 mV normalized to cell capacitance. n = 5 cells from 4 animals. \*P<0.05, unpaired t-test. (D) Typical recordings of whole-cell TICC in a SMCs a 3 M-old *Col4a1*<sup>+/+</sup> mouse.  $V_H$  = -70 mV. TICCs were inhibited by NBA (3  $\mu$ M). (E) Summary of TICC activity and amplitude in the presence and absence of NBA. n = 7 cells from 3 animals. \*P<0.05, unpaired t-test.

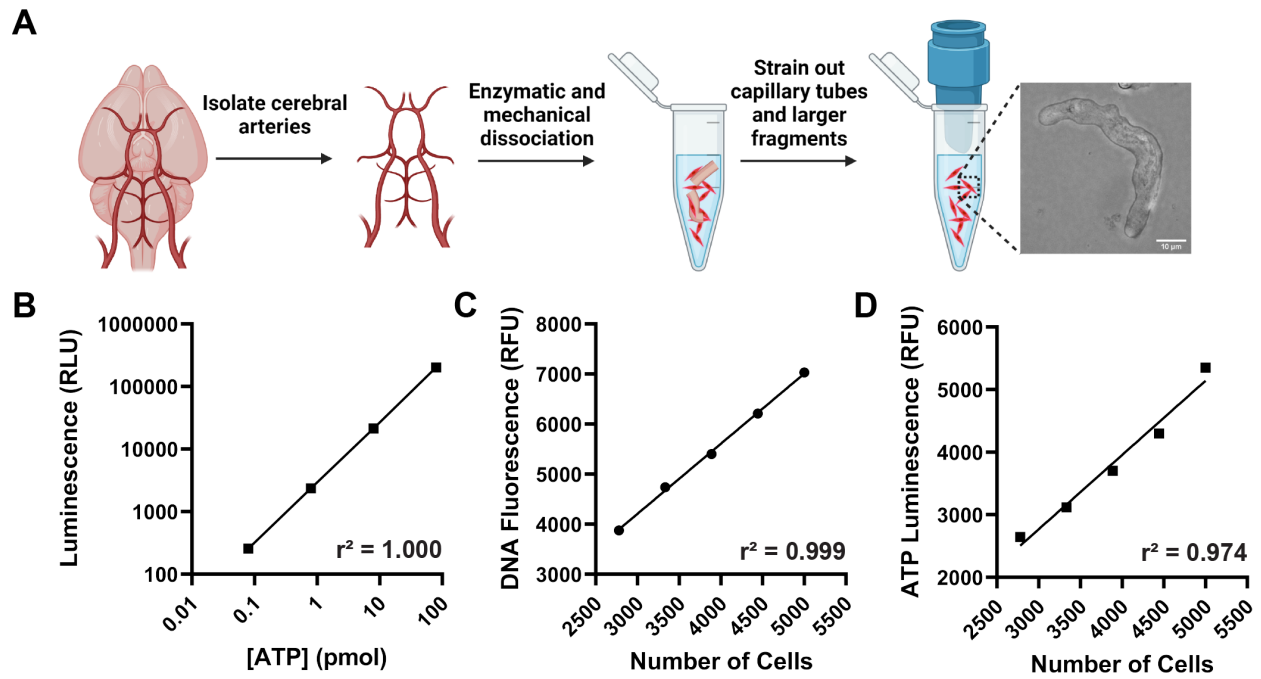

**Figure 5 – figure supplement 1 – ATP assay validation.** (A) Preparation of SMCs for ATP assay. (B) Relative luminescence units (RLU) are directly proportional to the [ATP] over four orders of magnitude (0.08 to 80 pmol) ( $r^2 = 1.00$ ). (C) DNA fluorescence (relative fluorescence units, RFU) as a function of cell number ( $r^2 = 0.99$ ). (D) ATP luminescence (RLU) as a function of cell number ( $r^2 = 0.97$ ).

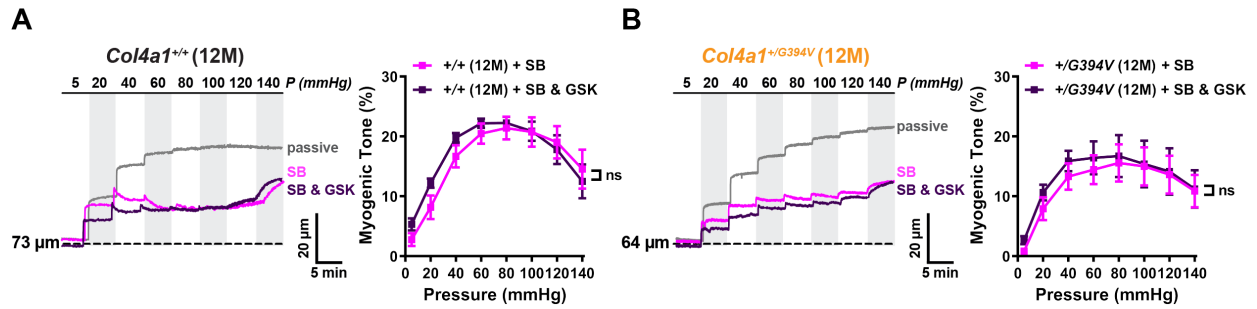

**Figure 5 – figure supplement 2 – Myogenic tone with SB-431542 and GSK1059615.**

(A and B) Representative traces and summary data of the myogenic response of cerebral arteries from 12 M-old *Col4a1*<sup>+/+</sup> (A) and *Col4a1*<sup>+/G394V</sup> (B) mice after first blocking TGF- $\beta$  receptors with SB-431542 (1  $\mu$ M, 30 min) and then blocking both TGF- $\beta$  receptors and PI3K with the addition of GSK1059615 (10 nM, 30 min). Combined blockade did not have an additive effect. n = 5 or 6 arteries from 3 animals per group. \*P<0.05, ns = not significant, 2-way ANOVA.

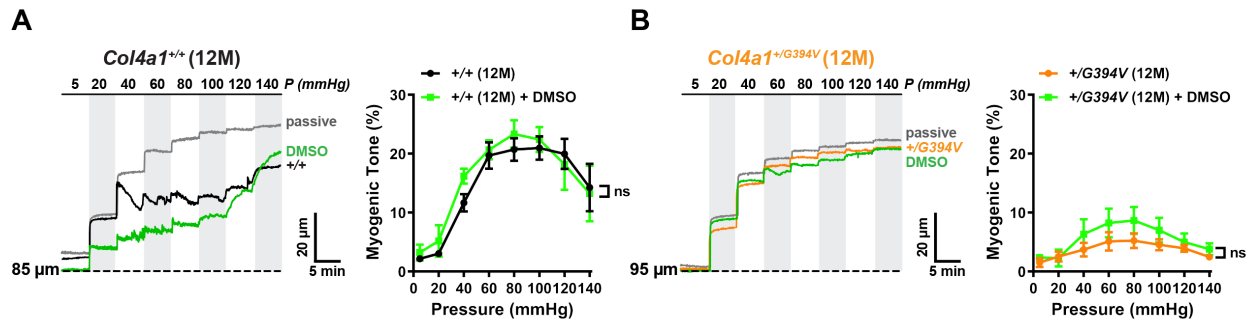

**Figure 5 – figure supplement 3 – Vehicle control experiments. (A and B)**

Representative traces and summary data of the myogenic response of cerebral pial arteries from 12 M-old *Col4a1*<sup>+/+</sup> (A) and *Col4a1*<sup>+/G394V</sup> (B) mice before and after treating arteries with DMSO (0.01%), the vehicle for GSK1059615 and SB-431542 (30 min). n = 4-6 arteries from 4 or 5 animals per group. ns = not significant, 2-way ANOVA.
